# Supplementary material for: Increased CCL-5 (RANTES) Gene Expression in the Choroid Plexus of Dogs with Canine Leishmaniosis
Source: MDPI journal article supplement (doi:10.3390/ani13132060), 2023-06-22
Supplement: s1 [file s1]

## Supplementary Materials

**Supplementary Table S1.** Serological. hematological and biochemical data from the dogs used in the study. clinical signs and clinical staging.

| Dogs | Sex | ELISA O.D<br><i>Leishmania</i><br><i>spp.</i> (cut-off<br>> 0.270) | RBC<br>x106/ $\mu$ l | Hb<br>g/dl | HT<br>(%) | WBC<br>(/ $\mu$ l) | NEU<br>(/ $\mu$ l) | LINF<br>(/ $\mu$ l) | PPL<br>x103/ $\mu$ l | PPT<br>g/dl | ALT<br>(U/L) | FA<br>(U/L) | PT<br>(U/L) | CREAT<br>(mg/dl) | URE<br>(mg/dl) | ALBUM<br>(mg/dl) | Clinical<br>Signs** | Clinical<br>Staiging<br>(Sollano-<br>Gallego,<br>2009) |
|------|-----|--------------------------------------------------------------------|----------------------|------------|-----------|--------------------|--------------------|---------------------|----------------------|-------------|--------------|-------------|-------------|------------------|----------------|------------------|---------------------|--------------------------------------------------------|
| 1    | F   | 0.347                                                              | 6.92                 | 15.3       | 47        | 20200              | 17170              | 606                 | 220                  | 6.8         | 47           | 38          | 8.0         | 1.8              | 15             | 3.03             | 1                   | 2                                                      |
| 2    | M   | 0.693                                                              | 4.73                 | 11.0       | 34        | 10700              | 7276               | 3210                | 220                  | 9.0         | 42           | 293         | 8.8         | 0.9              | 28             | 1.54             | 1                   | 1                                                      |
| 3    | F   | 0.904                                                              | 5.2                  | 11.3       | 35        | 14600              | 12848              | 1168                | 380                  | 8.6         | 46           | 50          | 8.1         | 2.3              | 73             | 1.22             | 2                   | 3                                                      |
| 4    | M   | 0.582                                                              | 7.04                 | 15.0       | 46        | 14500              | 10440              | 2900                | 320                  | 7.7         | 15           | 19          | 5.4         | 0.9              | 21             | 1.82             | 2                   | 2                                                      |
| 5    | M   | 0.329                                                              | 2.26                 | 4.3        | 14        | 40200              | 36180              | 402                 | 240                  | 6.6         | 12           | 50          | 6.0         | 2.4              | 85             | 0.89             | 3                   | 4                                                      |
| 6    | F   | 0.656                                                              | 4.24                 | 9.0        | 28        | 16800              | 11928              | 3528                | 200                  | 11.3        | 204          | 837         | 11.5        | 1.4              | 50             | 1.12             | 1                   | 2                                                      |
| 7    | F   | 0.484                                                              | 3.32                 | 6.3        | 20        | 23900              | 21988              | 717                 | 320                  | 8.0         | 43           | 46          | 7.7         | 0.9              | 40             | 1.16             | 2                   | 1                                                      |
| 8    | M   | 0.498                                                              | 3.27                 | 7.3        | 22        | 3800               | 3040               | 532                 | 80                   | 5.4         | **           | **          | 5.7         | 1.2              | 20             | 1.95             | 1                   | 2                                                      |
| 9    | M   | 1.291                                                              | 0.98                 | 2.3        | 7         | 18600              | 74484              | 372                 | 240                  | 6.8         | **           | **          | 7.1         | 1.5              | 30             | 2.37             | 2                   | 2                                                      |
| 10   | M   | 0.678                                                              | 0.41                 | 0.7        | 3         | 24500              | 23520              | 245                 | 160                  | 7.2         | **           | **          | 7.4         | 2.6              | 21             | 2.53             | 3                   | 3                                                      |
| 11   | M   | 1.323                                                              | 2.36                 | 5.3        | 16        | 3400               | 2788               | 442                 | 80                   | 7.2         | **           | **          | 7.5         | 1.5              | 20             | 1.85             | 2                   | 2                                                      |

|           |   |       |      |      |    |       |       |      |     |      |    |    |      |     |     |      |     |     |
|-----------|---|-------|------|------|----|-------|-------|------|-----|------|----|----|------|-----|-----|------|-----|-----|
| 12        | F | 1.365 | 5.1  | 11.9 | 36 | 8700  | **    | 900  | 70  | 8.0  | ** | ** | 6.5  | 0.6 | 14  | 1.37 | 1   | 1   |
| 13        | M | 0.754 | 4.3  | 10.2 | 31 | 11300 | **    | 200  | 50  | 8.0  | ** | ** | 7.1  | 0.9 | 14  | 1.83 | 2   | 2   |
| 14        | F | 0.720 | 3.1  | 6.2  | 19 | 11900 | **    | 3600 | 60  | 6.0  | ** | ** | 5.6  | 0.5 | 17  | 1.03 | 1   | 1   |
| 15        | F | 0.837 | 2.0  | 5.4  | 16 | 12600 | **    | 100  | 20  | 5.4  | ** | ** | 5.6  | 0.4 | 7   | 0.70 | 1   | 1   |
| 16        | F | 0.533 | 4.2  | 10.8 | 32 | 9000  | **    | 800  | **  | 8.0  | ** | ** | 8.1  | 0.7 | 6   | 1.30 | 2   | 2   |
| 17        | M | 1.137 | 1.7  | 3.6  | 11 | 4900  | **    | 1100 | 37  | 8.0  | ** | ** | 8.6  | 2.2 | 168 | 1.40 | 2   | 3   |
| 18        | F | 0.378 | 0.4  | 1.0  | 3  | 13500 | **    | 6900 | 150 | 12.0 | ** | ** | 11.7 | 1.0 | 7   | 2.30 | 2   | 2   |
| 19        | M | 0.710 | 5.5  | 12.2 | 37 | 14900 | **    | 300  | 110 | 9.0  | ** | ** | 9.5  | 1.0 | 8   | 1.60 | 2   | 2   |
| Control 1 | M | 0.069 | 6.87 | 14.3 | 44 | 18500 | 13135 | 2590 | 300 | 7.0  | 40 | 28 | 5.8  | 0.9 | 24  | 2.66 | *** | *** |
| Control 2 | M | 0.124 | 8.08 | 17.0 | 48 | 15300 | 9486  | 2295 | 220 | 7.3  | 72 | 21 | 6.7  | 1.0 | 26  | 4.12 | *** | *** |
| Control 3 | M | 0.215 | 7.41 | 15.3 | 47 | 10600 | 5480  | 1200 | 220 | 8.7  | 42 | 27 | 7.7  | 1.4 | 23  | 2.71 | *** | *** |
| Control 4 | M | 0.614 | 5.16 | 15.3 | 37 | 6600  | 5280  | 1000 | 320 | 8.6  | 15 | 19 | 8.4  | 1.2 | 108 | 2.00 | *** | *** |

- Values lower than references values;
- Values higher than references values.

\*\*Clinical Signs:

1 – Lymphadenopathy and dermatological signs;

2 – Onychogryphosis. ulcers. weight loss;

3 – Cachexia. uveitis. arthritis. signs of chronic kidney disease (uremic breath. stomatitis).

**Supplementary Table S2.** Histopathological evaluation according to region and intensity of inflammation.

| Dog | Intensity of Inflammation / Region |             |                | Perivascular Cuffs |
|-----|------------------------------------|-------------|----------------|--------------------|
|     | Leptomeninges                      | Subependyma | Choroid Plexus |                    |
| 1   | 3                                  | 0           | 2              |                    |
| 2   | 3                                  | 2           | 3              | +                  |
| 3   | 1                                  | 0           | 1              |                    |
| 4   | 2                                  | 0           | 2              |                    |
| 5   | 3                                  | 1           | 3              | +                  |
| 6   | 3                                  | 1           | 2              |                    |
| 7   | 3                                  | 2           | 3              | +                  |
| 8   | 1                                  | 0           | 1              |                    |
| 9   | 2                                  | 0           | 2              |                    |
| 10  | 2                                  | 1           | 2              |                    |
| 11  | 1                                  | 0           | 1              |                    |
| 12  | 3                                  | 1           | 2              |                    |
| 13  | 2                                  | 1           | 2              |                    |
| 14  | 2                                  | 0           | 1              |                    |
| 15  | 3                                  | 2           | 3              | +                  |
| 16  | 2                                  | 1           | 2              |                    |
| 17  | 3                                  | 2           | 3              | +                  |
| 18  | 2                                  | 1           | 2              |                    |
| 19  | 1                                  | 0           | 0              |                    |

0 – (-) Absence of inflammatory cells;

1 – (+) Discreet or focal accumulation of rare cells;

2 – (++) Diffuse or multifocal accumulation of few cells;

3 – (+++) Marked presence of inflammatory cells.

(+) Presence of perivascular cuffs formed by at least two layers of inflammatory cells.
